# Supplementary material for: Structural identification of neutralizing antibodies induced bynucleic acid encoded native-like trimer
Source: Research Square preprint supplement (doi:10.21203/rs.3.rs-275402/v1), 2021-03-15
Supplement: Supplementary file 1 [file 2da84b86cdd07f89a1f823f3.xlsx]

## Sheet: Figure 2A
	pool 1										pool 2										pool 3
naive	3.9	2.8	1.1	0	5.6						0	5	2.8	0	0.6						0	0.6	8.9	1.1	1.1
pVax1	1.7	5.6	1.7	1.1	6.7						0	3.9	3.3	0	8.3						5	13.9	0	1.1	18.3
rProtein	56.7	13.3	4.4	0	28.3	0.6	9.4	2.8	20	18.3	41.7	46.7	6.1	13.3	21.7	0	15	13.3	18.3	26.7	15	13.3	15	1.7	13.3	4.4	65	10	13.3	1.1
SynDNA	936.7	550	336.7	671.7	938.3	368.3	696.7	481.7	226.7	458.3	423.3	130	866.7	1476.7	403.3	878.3	2033.3	331.7	511.7	298.3	275	73.3	325	316.7	248.3	205	293.3	101.7	111.7	465

## Sheet: Figure 2B
	CD4										CD8
naive	0.0984	0.0384	0.0384	0.0684	0.0384						0.1324	0.0024	0.0124	0.1424	0
pVax1	0.0484	0.0184	0.0384	0.0384							0.0724	0.0024	0	0.0424
protein	0.0884	0.0384	0.0484	0	0	0.0184	0.0064	0	0.0004		0.0124	0.0524	0.0524	0	0	0	0	0	0
SynDNA	0.5084	0.2984	0.2784	0.2084	0.2184	0.1584	0.4284	0.4284		0.3384	0.8724	0.2224	0.6824	1.3624	0.5024	1.0124	2.2224	0.4224	0.5924	0.3324

## Sheet: Figure 2C
naive	pVax1	rProtein	SynDNA
1.36	0.94	4.37	13.9
1	1.02	3.72	12
1.21	1.06	2.1	13.9
1.16		2.91	19.8
		1.09	14

## Sheet: Figure 2D
naive	pVax1	rProtein	SynDNA
0.31	0.69	1.09	2.28
0.32	0.7	1.13	2.5
0.55	0.69	0.96	2.58
0.83		1.16	2.9
		0.97	2.29

## Sheet: Figure 2E
	naive										pVax1										rProtein										SynDNA
0	100	100	100	100	100						100	100	100	100	100						100	100	100	100	100	100	100	100	100	100	100	100	100	100	100	100	100	100	100	100
2	100	100	100	100	100						100	100	100	100	100						100	100	100	100	100	100	100	100	100	100	362.6	209.8	214.3	393	100	104.6	100	342.4	100	100
5																					100	240.3	100	5056	1417	100	191.1	12244	415.3	100	30936	26680	12545	6084	22045	10578	14029	19656	14319	13701
8	100	100	100	100	100						100	100	100	100	100						20500	28964	13734	120500	3075	10936	39391	4711	22731	61837	122222	62267	25200	12459	121083	290192	75353	83026	80040	42310

## Sheet: Figure 3B
	pool 1					pool 2					pool 3
naive	25	15.5556	0	5	2.22222	18.3333	5.55556	7.77778	0	2.77778	13.3333	2.77778	0.555556	0	9.44444
pVax1	2.22222	5.55556	3.88889	5.55556	6.66667	2.22222	4.44444	10.5556	7.77778	0	11.6667	16.1111	7.22222	2.22222	0
short	221.667	1010	565	605	383.333	358.333	1185	180	466.667	466.667	350	376.667	311.667	351.667	183.333
long	2483.33	1818.33	1371.67	758.333		1675	428.333	750	233.333		771.111	1488.33	955	365

## Sheet: Figure 3C
	CD4					CD8
naive	0.0984	0.0384	0.0384	0.0684	0.0384	0.1324	0.0024	0.0124	0.1424	0
pVax1	0.0484	0.0184	0.0384	0.0384		0.0724	0.0024	0	0.0424
short	0.34	0.58	0.24	0.53	0.29	0.34	0.18	0.22	0.15	0.25
long	0.698533	1.47853	0.568533	0.268533	0.278533	0.492867	0.432867	0.412867	0.282867	0.392867

## Sheet: Figure 3D
	naive					MD39
0	100	100	100	100	100	100	100	100	100	100
5	100	100	100	100	100	6895	18119	8151	26642	19827
8	100	100	100	100	100	12228	81071	20037	16350	42468

## Sheet: Figure 3E
	naive					MD39
0	100	100	100	100	100	100	100	100	100	100
2	100	100	100	100	100	414	100	100	268.9	100
5	100	100	100	100	100	8458	1981	330.6	8999	8611
16	100	100	100	100	100	14197	19834	1863	10212	27331
18	100	100	100	100	100	43026	44511	4559	41209	26960

## Sheet: Figure 3F
naive	pVax1	short	long
100	100	20200	43026
100	100	40794	44511
100	100	11338	4559
100	100	29055	41209
100	100	15548	26960

[truncated: 6 more sheets: Figure S3A, Figure S3B, Figure S4B, Figure S5A, Figure S5B, Figure S9B]
